# Supplementary material
Source: Springer Nature journal article supplement (https://www.springermedizin.de/resource/supplementary/12916_2011_488_MOESM1_ESM.pdf/9599768)
Supplement: MOESM1 [file 9599768]

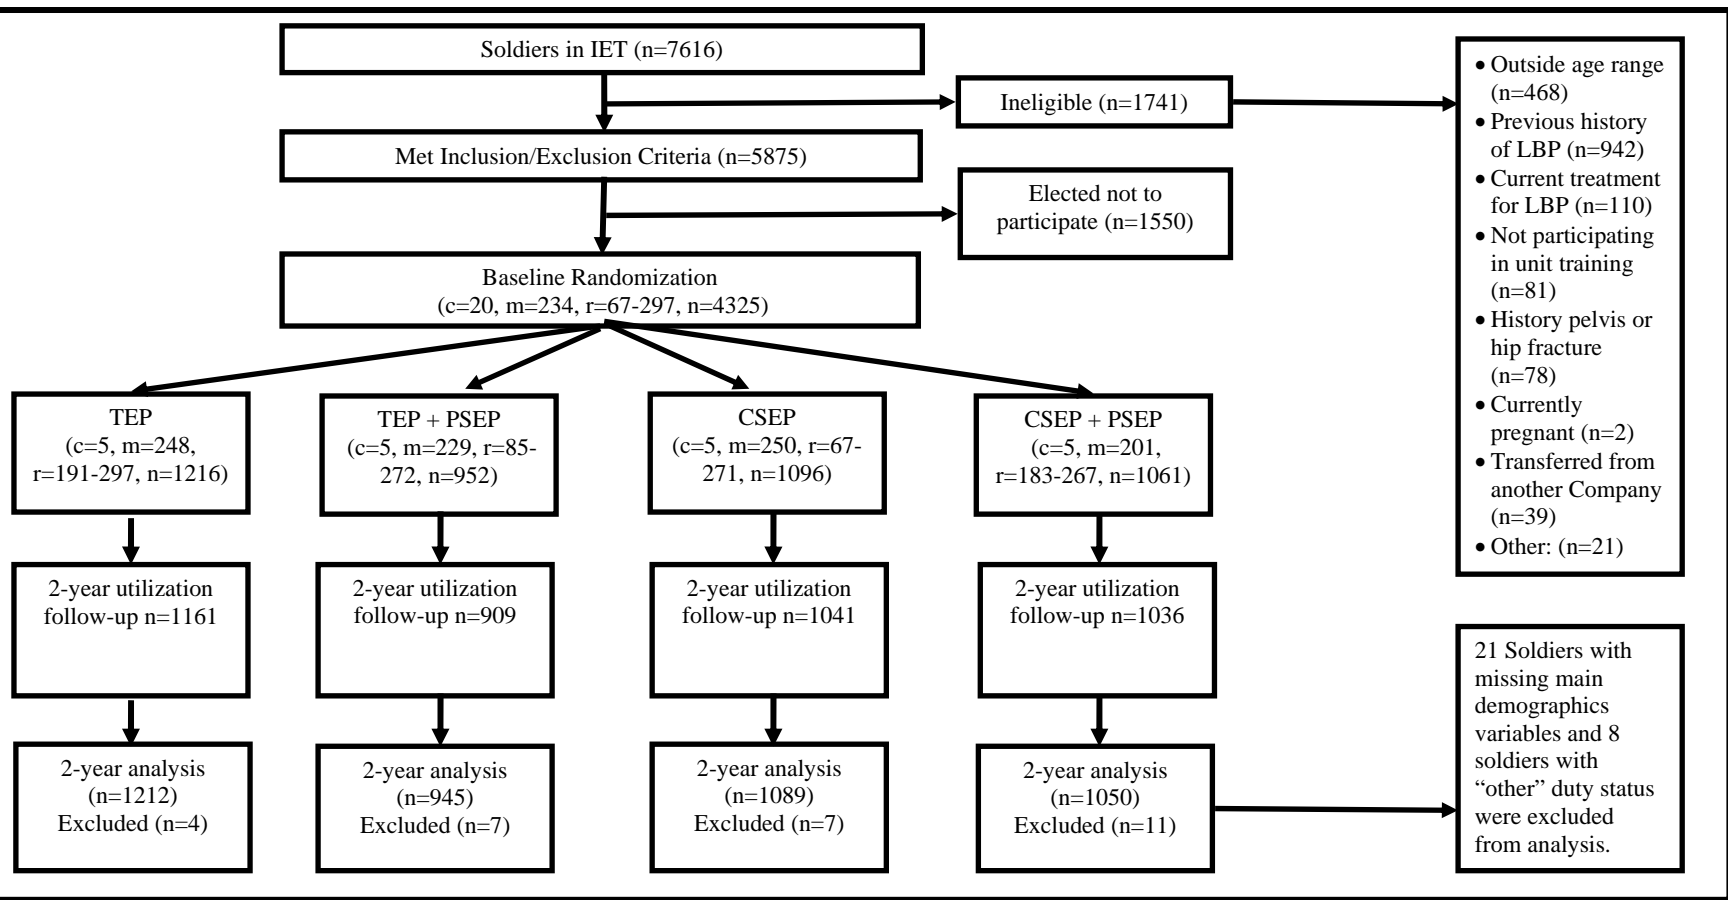

Initial Entry Training (IET), Low Back Pain (LBP)  
 Core Stabilization Exercise Program (CSEP), Traditional Exercise Program (TEP), and Psychosocial education (PSEP)  
 c = number of companies, m = median of # of soldiers per company, r = min – max, n = total number of soldiers.
